# Supplementary material for: Molecular Iodine Supplement Prevents Streptozotocin-Induced Pancreatic Alterations in Mice
Source: MDPI journal article supplement (doi:10.3390/nu14030715), 2022-02-08
Supplement: s1 [file s1]

**Supplementary Table S1. Antibodies used for immunohistochemistry or western blot assays.**

| <b>Antibody</b>                                     | <b>Dilution</b> | <b>Catalogue #</b> | <b>Manufacturer</b>       |
|-----------------------------------------------------|-----------------|--------------------|---------------------------|
| Rabbit monoclonal anti-CD34                         | 1 : 1000        | ab182981           | Abcam                     |
| Mouse monoclonal anti-VEGF                          | 1 : 2500        | sc-65617           | Santa Cruz Biotechnology  |
| Mouse monoclonal anti-insulin B                     | 1 : 500         | sc-377071          | Santa Cruz Biotechnology  |
| Mouse monoclonal anti-glucagon                      | 1 : 500         | sc-514592          | Santa Cruz Biotechnology  |
| Mouse monoclonal anti-GFAP                          | 1:500           | sc-33673           | Santa Cruz Biotechnology  |
| Mouse monoclonal Anti- $\alpha$ SMA                 | 1:500           | sc-32251           | Santa Cruz Biotechnology  |
| Rabbit polyclonal anti-TNF $\alpha$                 | 1 : 2500        | 3707               | Cell Signaling Technology |
| Rabbit monoclonal anti-IL10                         | 1 : 2500        | 12163              | Cell Signaling Technology |
| Mouse monoclonal anti-TGF $\beta$ 1                 | 1 : 2500        | sc-130348          | Santa Cruz Biotechnology  |
| Mouse monoclonal anti-CD8a                          | 1 : 1000        | sc-7970            | Santa Cruz Biotechnology  |
| Mouse monoclonal anti-iNOS                          | 1 : 200         | sc-7271            | Santa Cruz Biotechnology  |
| Mouse monoclonal anti-Nfr2                          | 1 : 250         | sc-365949          | Santa Cruz Biotechnology  |
| Rabbit monoclonal anti-PPAR $\gamma$                | 1 : 2500        | sc-7196            | Santa Cruz Biotechnology  |
| Mouse monoclonal anti-PPAR $\gamma$ phospho ser 112 | 1 : 2500        | MAB3632            | Millipore                 |
| Mouse monoclonal anti- $\beta$ Actin                | 1 : 5000        | sc-47778           | Santa Cruz Biotechnology  |
| Horse anti mouse IgG biotinylated                   | 1:2000          | BA-1000            | Vector Laboratories       |
| Goat anti rabbit IgG biotinylated                   | 1:250           | BA-2000            | Vector Laboratories       |
| Mouse IgGk BP-HRP                                   | 1:10000         | sc-516102          | Santa Cruz Biotechnology  |
| Goat anti rabbit-HRP                                | 1:5000          | sc-2004            | Santa Cruz Biotechnology  |

VEGF, vascular endothelial growth factor; GFAP, glial fibrillary acidic protein;  $\alpha$ SMA, smooth muscle actin type alpha; TNF $\alpha$ , tumoral necrosis factor type alpha; IL10, interleukin 10; TGF $\beta$ 1, transforming growth factor beta; iNOS, inducible nitric oxide synthase; PPAR $\gamma$ , peroxisome proliferator-activated receptor type gamma.

**Supplementary Table S2. Primer used for different gene amplification**

| Gene     | Reference   | Primer sequence                                                          | bp  |
|----------|-------------|--------------------------------------------------------------------------|-----|
| Catalase | NM_009804.2 | FW: 5'-TCCGGGATCTTTTAAACGCCATTG-3'<br>RV: 5'-TCGAGCACGGTAGGGACAGTTCAC-3' | 362 |
| Sod1     | NM_011434.2 | FW: 5'-TGGCCAATGTGTCCATTGAA-3'<br>RV: 5'-TACTGCGCAATCCCAATCAC-3'         | 181 |

bp, base pair; Sod1, superoxide dismutase type 1.
